# Supplementary material for: Gold nanoparticle decorated single walled carbon nanotube nanocomposite with synergistic peroxidase like activity for d-alanine detection
Source: Royal Society of Chemistry journal article supplement (doi:10.1039/c5ra01258a), 2015-01-01
Supplement: c5ra01258a1.pdf [file c5ra01258a1.pdf]

### Supporting information

**Figure S1** Dependence of the Peroxidase like activity of nanocomposite on; a) pH of the medium; b) nanocomposite concentration; c)  $\text{H}_2\text{O}_2$  concentration; and d) TMB concentration

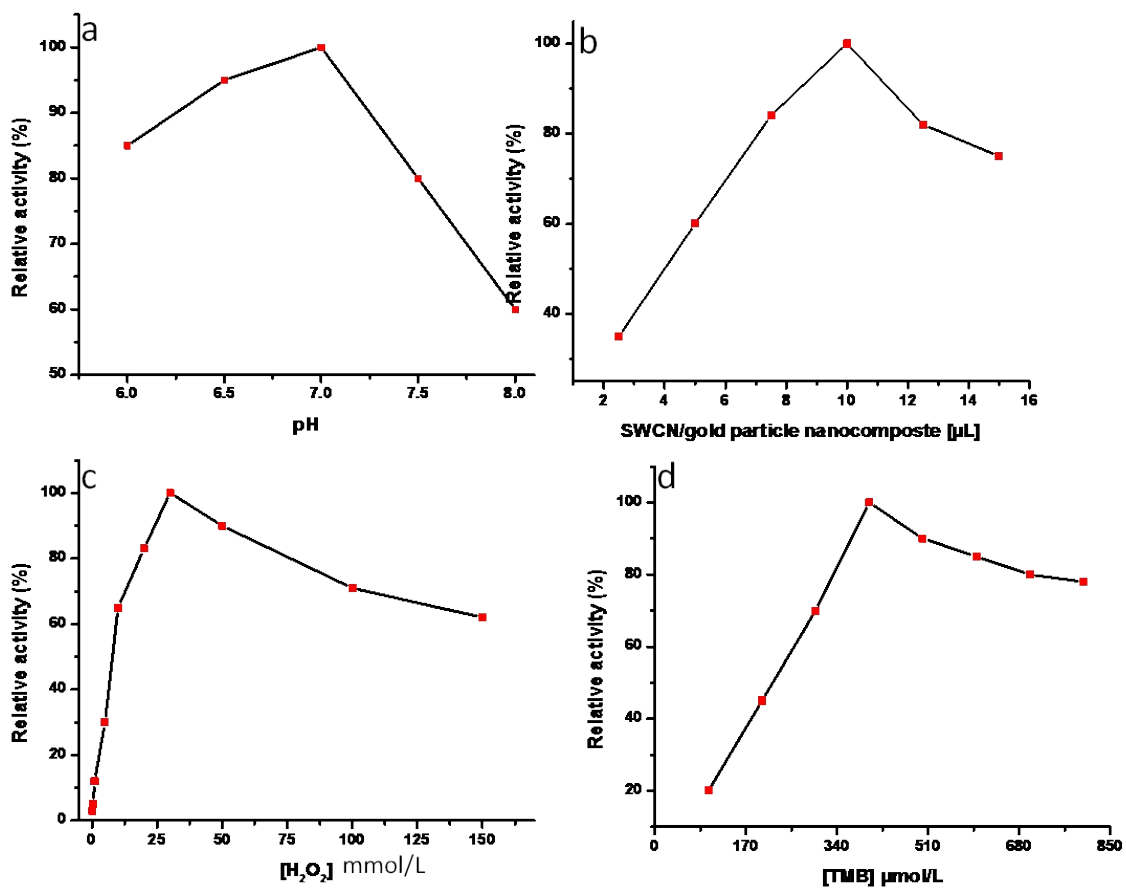

**Supplementary table 1.** Analytical performance of the proposed colorimetric method for H<sub>2</sub>O<sub>2</sub> and D-alanine detection

| Regression equation           |                       |        |           |                         |              |
|-------------------------------|-----------------------|--------|-----------|-------------------------|--------------|
| Analyte                       | Linear range (μmol/L) | Slope  | Intercept | Correlation coefficient | LOD (μmol/L) |
| H <sub>2</sub> O <sub>2</sub> | 0.5-25                | 0.0268 | 0.0347    | 0.995                   | 0.08         |
| D-alanine                     | 0.1-25                | 0.0234 | 0.0343    | 0.989                   | 0.05         |
